# Supplementary material for: Phenomenological Modelling of COVID-19 Epidemics in Sri Lanka, Italy, the United States, and Hebei Province of China
Source: Hindawi journal article supplement (doi:10.1155/2020/6397063), 2020-10-18
Supplement: f1 [file 6397063.f1.pdf]

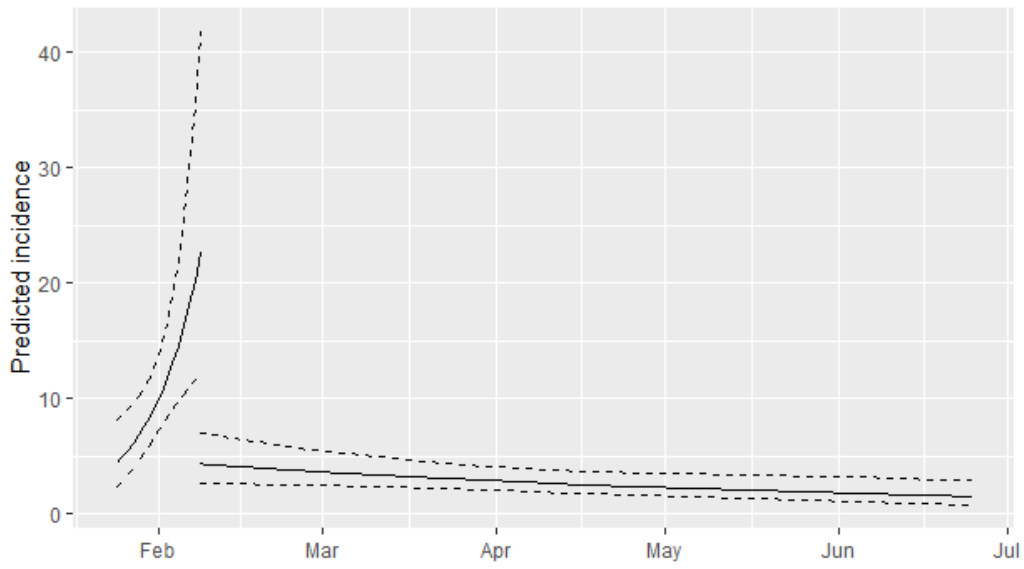

Figure 1: Fitted Prediction Models with Intervals for Infections in Hebei Province, China

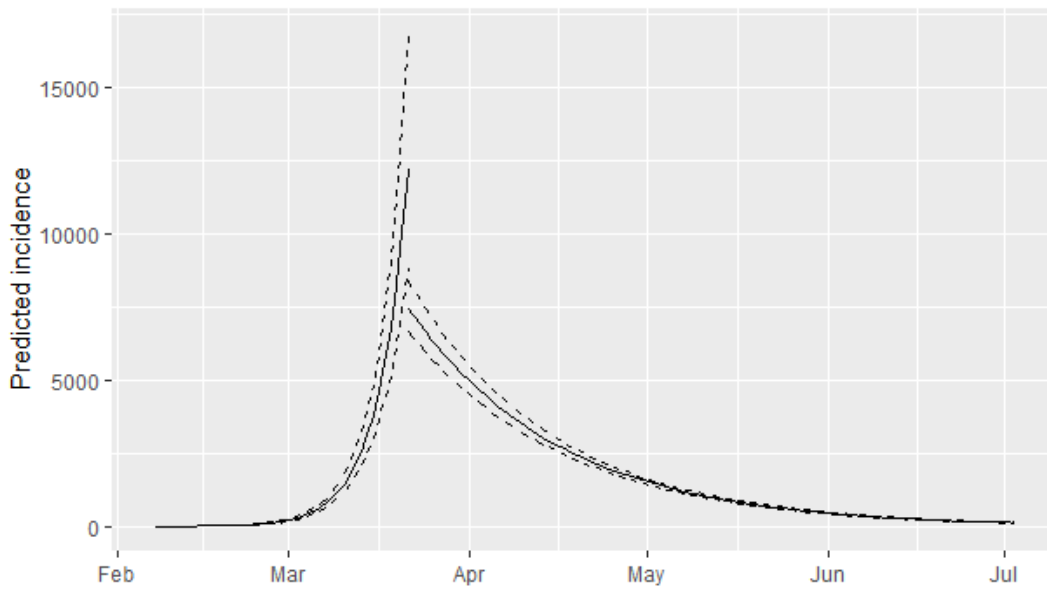

Figure 2: Fitted Prediction Models with Intervals for Infections in Italy

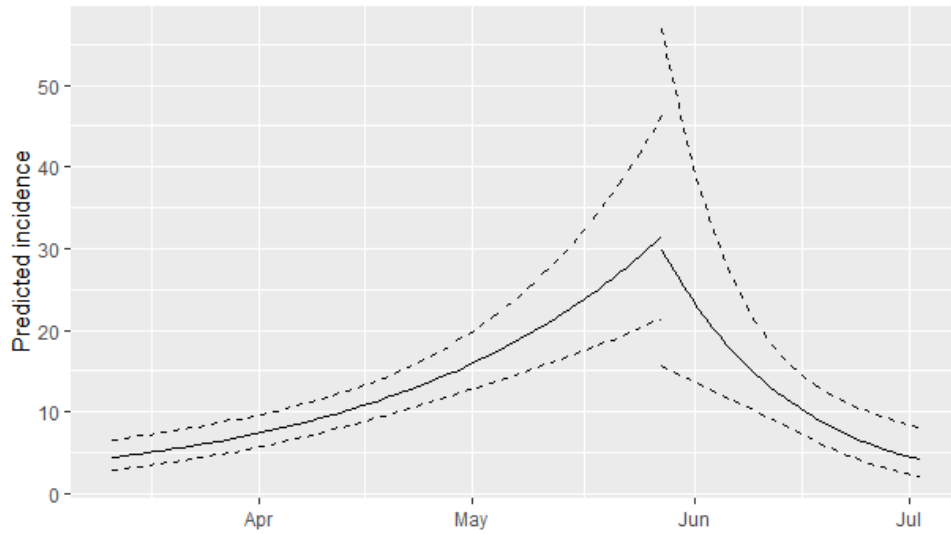

Figure 3: Fitted Prediction Models with Intervals for Infections in Sri Lanka

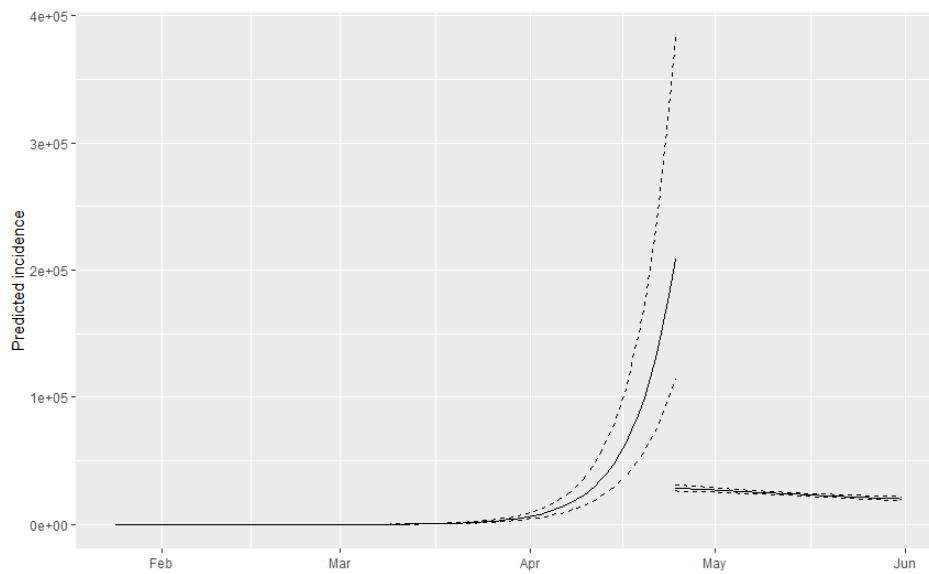

Figure 4: Fitted Prediction Models with Intervals for Infections in United States – First Data Set

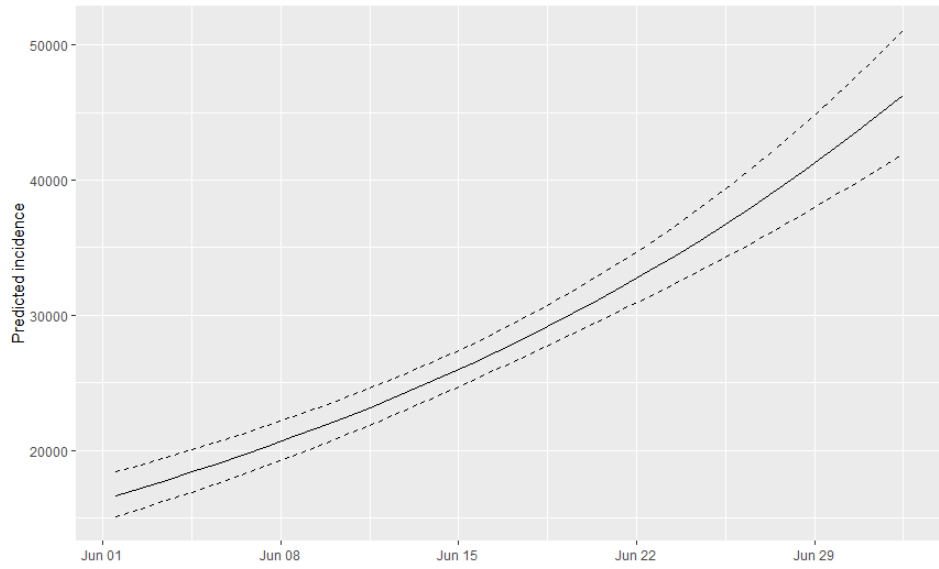

Figure 5: Fitted Prediction Model with Interval for Infections in United States – Second Data Set
